# Supplementary material
Source: Preprints.org preprint supplement (doi:10.20944/preprints202404.1369.v1)
Supplement: Supplementary file 1 [file supplementary]

**SUPPLEMENTARY MATERIAL**

**Title: Cooking Emissions Levels and Associated Health Effects among Households in Dodoma City, Tanzania.**

**Authors:**

Mwanini Yakobo Mkunda1*, Godson Anna2, Aiwerasia Vera Ngowi3, Jovine Bachwenkizi3

**Affiliations:**

1Pan African University Life and Earth Science Institute (Including Health and Agriculture) (PAULESI), University of Ibadan, Nigeria

2Faculty of Public Health, University of Ibadan, Nigeria

3Department of Environmental and Occupational Health, Muhimbili University of Health and Allied Sciences, Dar es Salaam, Tanzania

*****Corresponding Author:

Email: [mkunda200@gmail.com](mailto:mkunda200@gmail.com)

Phone: +255754325869

**1. Supplemental figure**

**1.1 The storage of fetched firewood in the household**


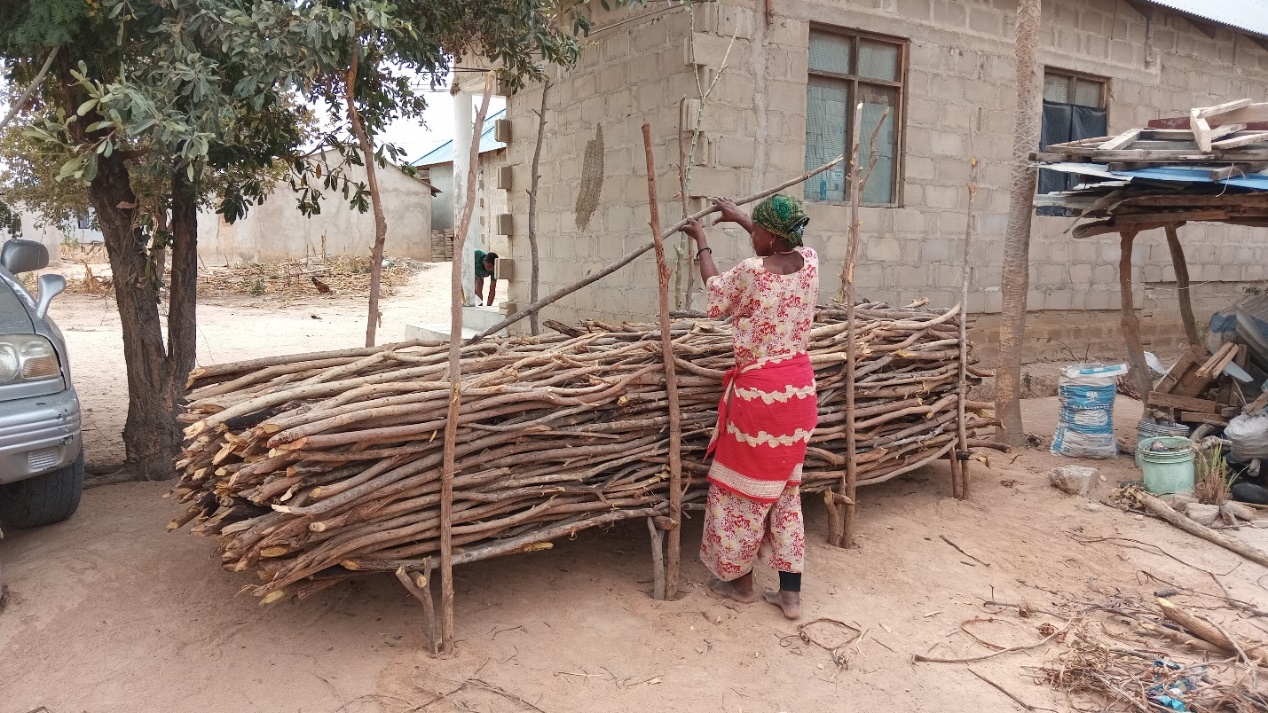


**Figure S1*.* Storage of fetched firewood in the household**

**1.2 Kitchen location sketches**

**
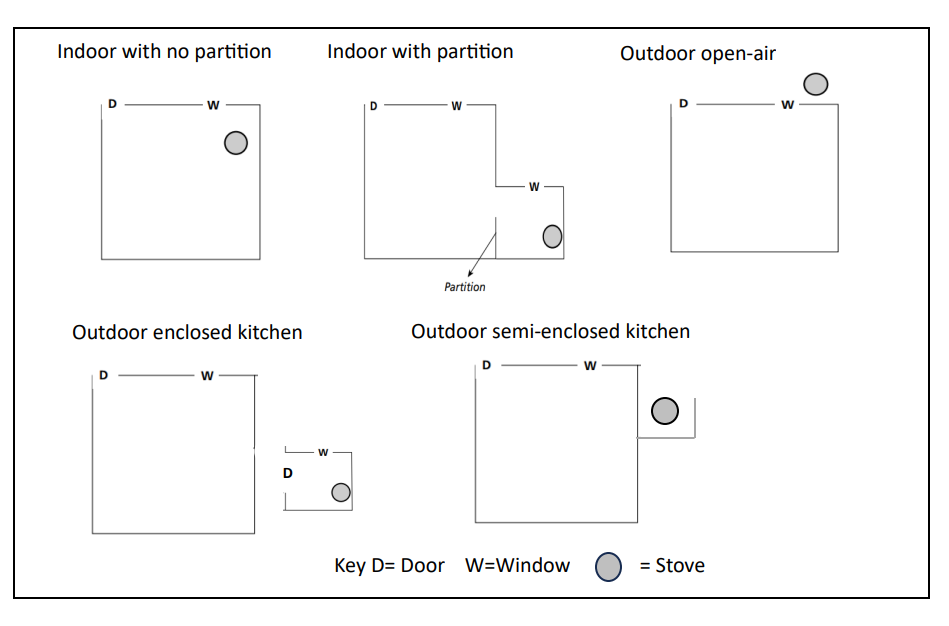
**

Figure S2. Sketch diagram showing the location of the kitchen

**1.3 Correlation among pollutant concentrations, temperature and relative humidity**


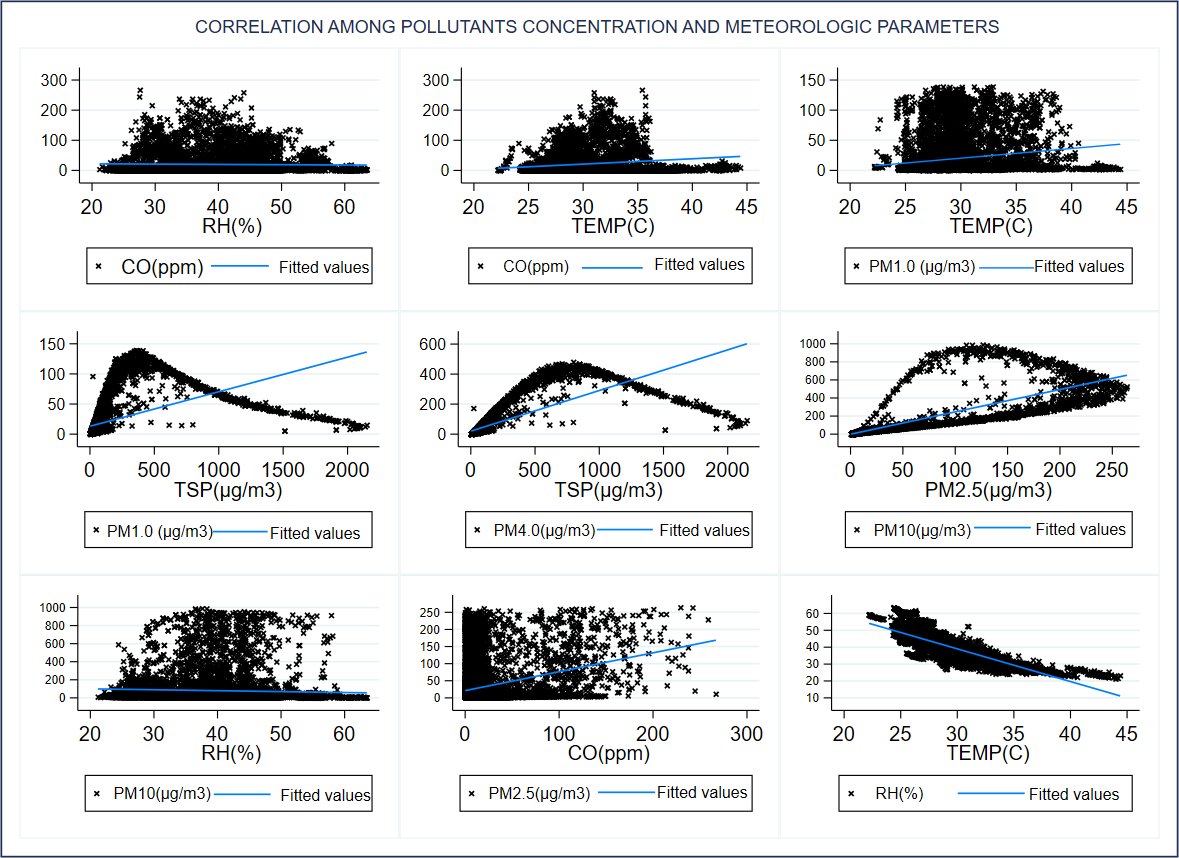


**Figure S3. Correlation among pollutant concentrations, temperature and relative humidity**

**2. Supplemental tables**

**Table S1. Spearman rank correlation coefficients among pollutant concentrations and meteorologic parameters**

| **Variables** | **CO** **(ppm)** | **PM1**  **(µg/m3)** | **PM2**.5  **(µg/m3)** | **PM4**  **(µg/m3)** | **PM10**  **(µg/m3)** | **RH**  **(%)** | **TEMP**  **(°C)** |
| --- | --- | --- | --- | --- | --- | --- | --- |
| **CO** **(ppm)** |  |  |  |  |  | 0.0619 | 0.1568 |
| **PM1(µg/m3)** | 0.2835 |  |  |  |  | -0.1842 | 0.1666 |
| **PM2.5(µg/m3)** | 0.2833 | 0.9937 |  |  |  | -0.1816 | 0.1591 |
| **PM4(µg/m3)** | 0.2788 | 0.9790 | 0.9948 |  |  | -0.1828 | 0.1548 |
| **PM10(µg/m3)** | 0.2689 | 0.9513 | 0.9763 | 0.9920 |  | -0.1897 | 0.1530 |
| **TSP(µg/m3)** | 0.2419 | 0.9034 | 0.9365 | 0.9623 | 0.9869 | -0.2060 | 0.1553 |
| **TEMP (°C)** |  |  |  |  |  | -0.8321 |  |
